# Supplementary material for: Genome-Wide DNA Methylation Changes between the Superficial and Deep Backfat Tissues of the Pig
Source: MDPI journal article supplement (doi:10.3390/ijms13067098), 2012-06-08

# Genome-Wide DNA Methylation Changes between the Superficial and Deep Backfat Tissues of the Pig

## Supplementary Information

**Figure S1.** Distribution of CpGs in pig genome against distance between adjacent CpGs (bp). The accumulative % (bar) and % (black line) of CpGs against adjacent distance are charted in 10 bp windows beside the first class (2–10 bp). The adjacent distance of 88.82% CpGs in pig genome is within 200 bp (dashed horizontal line and black bar).

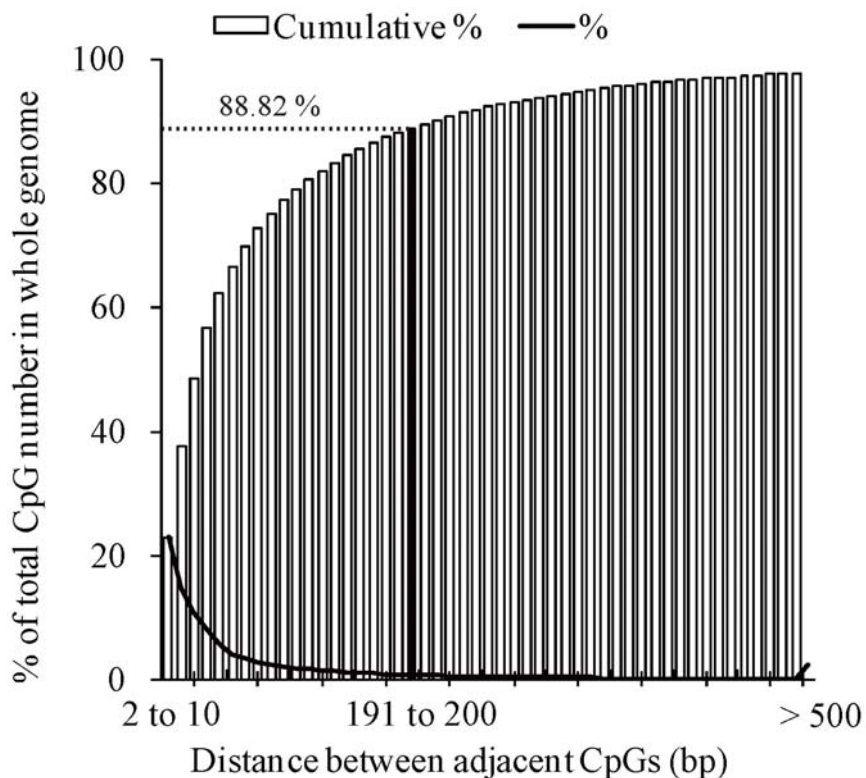

Supplement: s1 [file s1]
